# Supplementary material
Source: HighWire-hosted journal article supplement (https://erj.ersjournals.com/content/56/3/2050524)
Supplement: inline-supplementary-material-1 [file inline-supplementary-material-1.pdf]

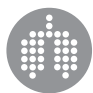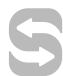

SHAREABLE PDF

**“Predictors of mortality for patients with COVID-19 pneumonia caused by SARS-CoV-2: a prospective cohort study.” Rong-Hui Du, Li-Rong Liang, Cheng-Qing Yang, Wen Wang, Tan-Ze Cao, Ming Li, Guang-Yun Guo, Juan Du, Chun-Lan Zheng, Qi Zhu, Ming Hu, Xu-Yan Li, Peng Peng and Huan-Zhong Shi. *Eur Respir J* 2020; 55: 2000524.**

The above-mentioned article has been corrected according to the amendments outlined below; the amendments have been discussed in the accompanying correspondence articles published in this issue of the *European Respiratory Journal* [1, 2].

Copyright ©ERS 2020
